# Supplementary material for: CopyRighter: a rapid tool for improving the accuracy of microbial community profiles through lineage-specific gene copy number correction
Source: PubMed Central journal article supplement (PMC4021573; doi:10.1186/2049-2618-2-11), 2014-04-07
Supplement: 2049-2618-2-11-S3.pdf [file 2049-2618-2-11-S3.pdf]

## **Supplementary protocol: Operating and sampling anaerobic digesters**

### ***Inoculum***

Two replicate anaerobic digesters named AD1 and AD3 were set-up in parallel and seeded with the same diverse inoculum (20% v/v) which consisted of samples taken from eight different anaerobic locations: six well-functioning engineered systems (three mesophilic ADs, thermophilic AD, Upflow Anaerobic Sludge Bioreactor (UASB) and anaerobic lagoon), and two natural environments (rumen and lake sediment).

### ***Reactor set-up and operation***

The replicate anaerobic digesters (2 L working volume) were run as semi-continuous completely mixed reactors with a hydraulic and sludge retention time (H/SRT) of 10 days. The temperature was held at 37°C ( $\pm 1^\circ\text{C}$ ) and pH was maintained at 7 by adding 1 M NaOH solution. Alpha cellulose (Sigma Aldrich, NSW Australia) was used as a feedstock to reduce the substrate complexity and minimise influence of microorganisms otherwise entering the system through a non-sterile feed. The sterile medium consisted of 3 g L<sup>-1</sup> Na<sub>2</sub>HPO<sub>4</sub>, 1 g L<sup>-1</sup> NH<sub>4</sub>Cl, 0.5 g L<sup>-1</sup> NaCl, 0.2465 g L<sup>-1</sup> MgSO<sub>4</sub>.7H<sub>2</sub>O, 1.5 g L<sup>-1</sup> KH<sub>2</sub>PO<sub>4</sub>, 14.7 mg L<sup>-1</sup> CaCl<sub>2</sub>, 2.6 g L<sup>-1</sup> NaHCO<sub>3</sub>, 0.5 g L<sup>-1</sup> C<sub>3</sub>H<sub>7</sub>NO<sub>2</sub>S, 0.25 g L<sup>-1</sup> Na<sub>2</sub>S.9H<sub>2</sub>O, and 1 mL of trace solution containing 1.5 g L<sup>-1</sup> FeSO<sub>4</sub>.7H<sub>2</sub>O, 0.15 g L<sup>-1</sup> H<sub>3</sub>BO<sub>3</sub>, 0.03 g L<sup>-1</sup> CuSO<sub>4</sub>.5H<sub>2</sub>O, 0.18 g L<sup>-1</sup> KI, 0.12 g L<sup>-1</sup> MnCl<sub>2</sub>.4H<sub>2</sub>O, 0.06 g L<sup>-1</sup> Na<sub>2</sub>Mo<sub>4</sub>.2H<sub>2</sub>O, 0.12 g L<sup>-1</sup> ZnSO<sub>4</sub>.7H<sub>2</sub>O, 0.15 g L<sup>-1</sup> CoCl<sub>2</sub>.6H<sub>2</sub>O, 10 g L<sup>-1</sup> EDTA and 23 mg L<sup>-1</sup> NiCl<sub>2</sub>.6H<sub>2</sub>O [1]. The medium was sparged with N<sub>2</sub> and then autoclaved at 121°C for 60 min for oxygen removal and sterilisation, respectively. The pH was adjusted to ~7.2 by addition

of HCl (37 vol%). The reactors were fed semi-continuously with alpha cellulose (5 g cellulose L<sup>-1</sup><sub>medium</sub>) at intervals of six hours, i.e. four times daily. During these feed events, approximately 50 mL of feed was pumped through the systems simultaneously using multi-head peristaltic pumps (John Morris Scientific, QLD Australia). This resulted in an organic loading rate (OLR) of 0.5 g alpha cellulose L<sup>-1</sup><sub>reactor volume</sub> d<sup>-1</sup>. Semi-continuous feeding mode was switched off between Days 12 and 24 (until a sufficient decrease in VFA concentration was observed) in order to minimize wash-out of slow-growing microorganisms and to allow the biomass in the reactors to increase.

### ***DNA extraction and 16S rRNA gene amplicon sequencing***

Samples for DNA extraction were taken at day 27 and 362, snap-frozen in liquid nitrogen and stored at -80 °C. DNA extractions were performed using FastDNA Spin kits for Soil (MPBio, US) according to the manufacturer's instructions. DNA quality was assessed using gel electrophoresis (1% agarose) and DNA concentrations were measured using Quant-iT dsDNA BR Assay kits and a Qubit fluorometer (Invitrogen, US).

Genomic DNA was extracted from samples taken from each reactor at 14 time points and 16S rRNA genes were amplified as described previously [2]. Briefly, PCR reactions (50 µL) were prepared with 20 ng of template DNA, 5 µL 10x buffer, 1 µL dNTP mix (10 mM each), 4 µL 25 mM MgCl, 1 µL forward primer (10 mM), 1 µL reverse primer (10 mM), 0.2 µL *Taq* polymerase and 1.5 µL BSA (Invitrogen, US) and 1µL (10 mM) of each of the universal primers targeting the V6-V8 region of the bacterial and archaeal 16S rRNA gene [3]: 926F (5'-AAACTYAAAKGAATTGRCGG-3') and 1392R (5'-ACGGGCGGTGTGTRC-3') modified on the 5' end to contain 454 sequencing adaptor sequences. The reverse primer also contained a

5-6 base sample-specific barcode sequence. The PCR program included one cycle at 95°C for 3 min, followed by 30 cycles at 95°C for 30 s, 55°C for 30 s and 75°C for 30 s, and then a final extension at 74°C for 10 min. Post amplification, amplicons were pooled and sequenced using the Roche 454 GS-FLX Titanium platform at the Australian Centre for Ecogenomics. Sequences were submitted to the NCBI Short Read Archive with accession number SRR1145444.

### ***Real-time quantitative PCR***

Total bacterial and archaeal biomass was estimated using real-time PCR for the two reactors at the same two time points subjected to 16S rRNA gene amplicon sequencing. The primers 1406F (5'-GYACWCACCGCCCGT-3') and 1525R (5'-AAGGAGGTGWTCCARCC-3') were used to amplify bacterial and archaeal 16S rRNA genes. For inhibition control, the rpsL F (5'-GTAAAGTATGCCGTGTTTCGT-3') and rpsL R (5'-AGCCTGCTTACGGTCTTTA-3') primer set was used, which is specific for *E. coli* DH10B rRNA. Two dilutions (1/100, 1/1000) were made of the microbial template DNA and run in parallel with an inhibition control test using *E. coli* DH10B genomic DNA. The PCR reaction was set up using 5 µL 2x SYBR Green/AmpliTaq Gold DNA Polymerase mix (Life Technologies), 4 µL template DNA and 1 µM primer mix (0.4 µM 1406F/1525R, 0.2 µM rpsL F/R) and each sample was run in triplicate. The PCR program included one cycle at 95°C for 10 min, followed by 40 cycles of 95°C for 15 s and 60°C for 1 min. A melt curve was produced by running one cycle at 95°C for 2 min and a final cycle at 60°C for 15 s. The cycle threshold (Ct) values were recorded and analysed using ABI SDS 2.4.1 software.

## ***References***

1. Dennis PG, Guo K, Imelfort M, Jensen P, Tyson GW, Rabaey K: **Spatial uniformity of microbial diversity in a continuous bioelectrochemical system.** *Bioresour Technol* 2013, **129**:599–605.
2. Cayford BI, Dennis PG, Keller J, Tyson GW, Bond PL: **High-throughput amplicon sequencing reveals distinct communities within a corroding concrete sewer system.** *Appl Environ Microbiol* 2012, **78**:7160–7162.
3. Engelbrektson A, Kunin V, Wrighton KC, Zvenigorodsky N, Chen F, Ochman H, Hugenholtz P: **Experimental factors affecting PCR-based estimates of microbial species richness and evenness.** *ISME J* 2010, **4**:642–647.
